# Supplementary material
Source: publisher site journal article supplement (https://www.dovepress.com/article/355210)
Supplement: Supplementary file 1 [file get_supplementary_file.php]

Supplementary Figure 1: Standard deviation histogram





Supplementary Figure 2: Univariate SD scatter plot


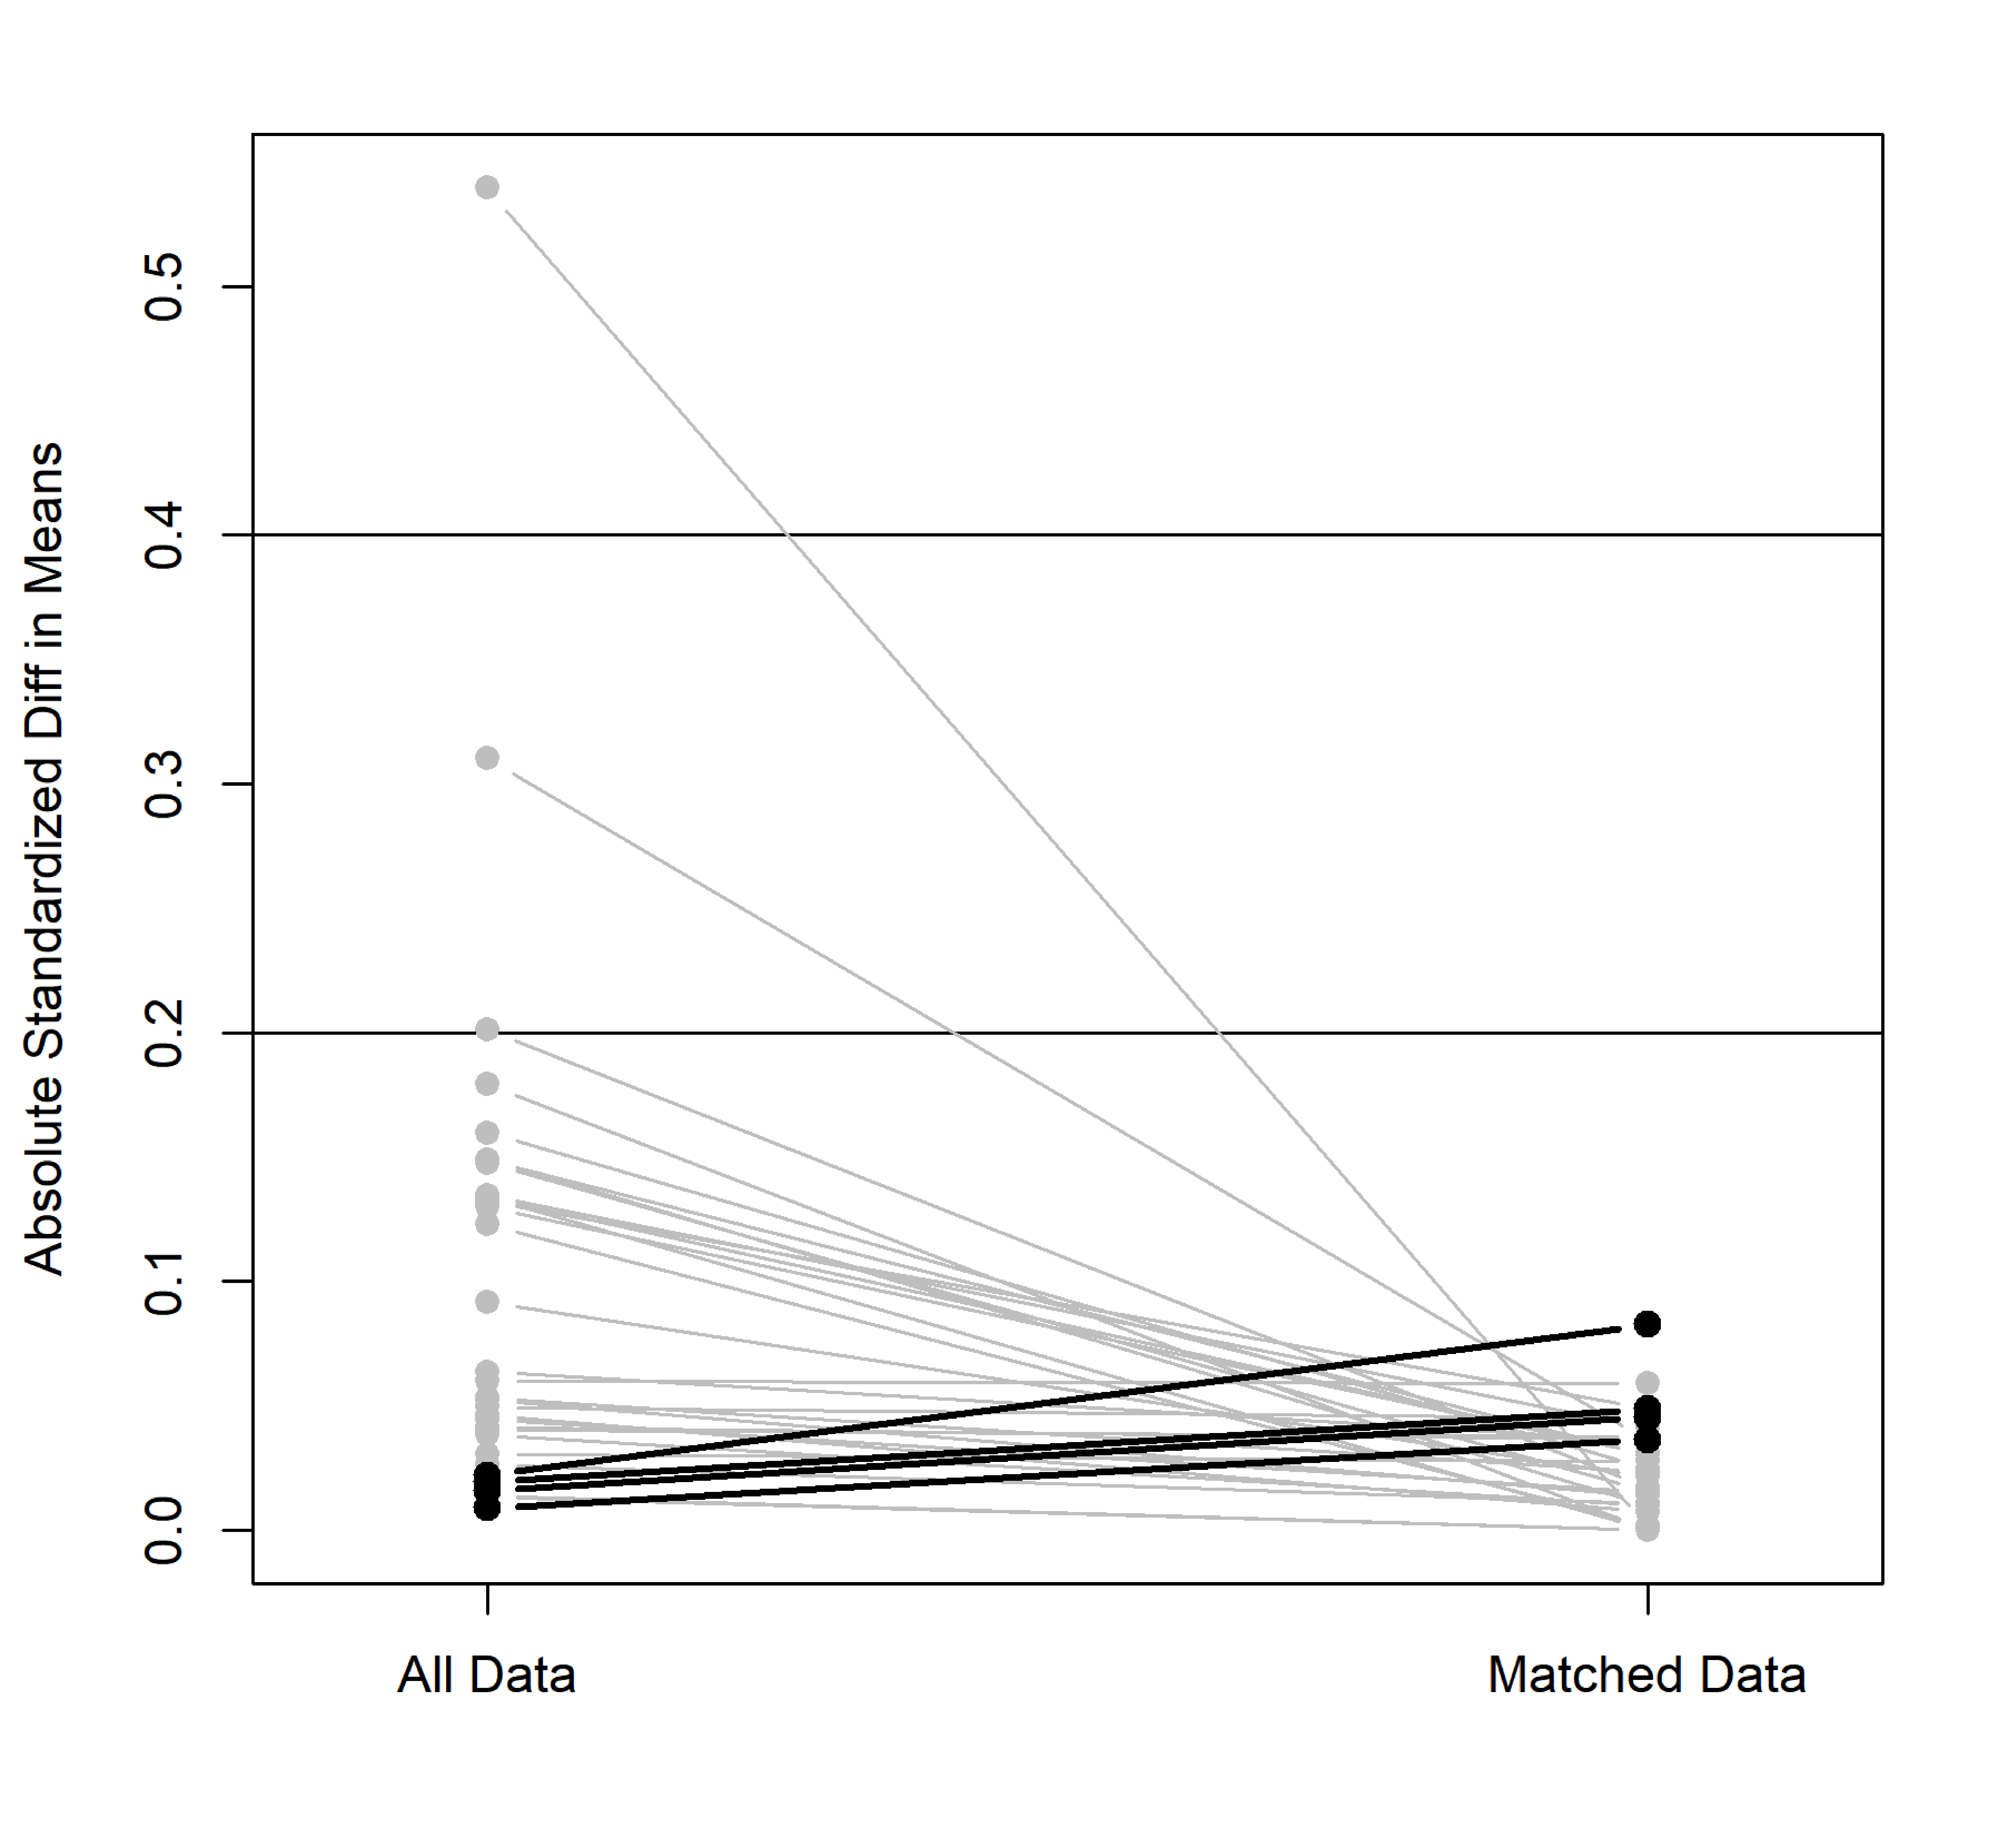


Supplementary Figure 3: Standardized difference change line

Supplementary Table 1. Risk factors for BARC 2,3,5 bleeding in elderly patients receiving dual antiplatelet therapy after percutaneous coronary intervention.

| Variables | HR (95%CI) | *P* value |
| --- | --- | --- |
| Ticagrelor use | 2.325(1.565-3.456) | <0.001 |
| Prior bleeding | 2.393(1.106-5.176) | 0.027 |
| Malignant tumor | 2.023(1.149-3.561) | 0.015 |

Abbreviations: BARC, Bleeding Academic Research Consortium; CI, confidence interval; HR, hazard ratio.

Supplementary Table 2. Risk factors for MACCEs in elderly patients undergoing percutaneous coronary intervention

| Variables | HR (95%CI) | *P* value |
| --- | --- | --- |
| Ticagrelor use | 0.981(0.720-1.337) | 0.904 |
| OMI | 1.536(1.026-2.221) | 0.023 |
| Ischemic stroke | 1.409(1.096-1.811) | 0.007 |
| PAD | 2.400(1.108-5.199) | 0.026 |
| eGFR | 0.991(0.984-0.997) | 0.006 |
| Multivessel disease | 1.719(1.260-2.347) | 0.001 |

Abbreviations: CI, confidence interval; eGFR, estimated glomerular filtration rate; HR, hazard ratio; MACCEs, major adverse cardiovascular and cerebrovascular events; OMI, old myocardial infarction; PAD, peripheral artery disease.
